## 1 **Despite the odds: formation of the SARS-CoV-2 methylation complex**

2

3 Alex Matsuda<sup>1</sup>, Jacek Plewka<sup>1</sup>, Yuliya Chykunova<sup>1,2</sup>, Alisha N. Jones<sup>3,4</sup>, Magdalena Pachota<sup>1,2</sup>, Michał Rawski<sup>1</sup>, André

4 Mourão<sup>3</sup>, Abdulkarim Karim<sup>1,5,6</sup>, Leanid Kresik<sup>1</sup>, Kinga Lis<sup>1,7</sup>, Igor Minia<sup>8</sup>, Kinga Hartman<sup>9</sup>, Ravi Sonani<sup>10</sup>, Grzegorz

5 Dubin<sup>10</sup>, Michael Sattler<sup>3,4</sup>, Piotr Suder<sup>9</sup>, Paweł Mak<sup>11</sup>, Grzegorz M. Popowicz<sup>3,4,\*</sup>, Krzysztof Pyrc<sup>1,\*</sup>, Anna Czarna<sup>1,\*</sup>

6

7

8 1. Virogenetics Laboratory of Virology, Malopolska Centre of Biotechnology, Jagiellonian University,  
9 Gronostajowa 7a, 30-387 Krakow, Poland.

10 2. Microbiology Department, Faculty of Biochemistry, Biophysics and Biotechnology, Jagiellonian University,  
11 Gronostajowa 7, 30-387 Krakow, Poland.

12 3. Helmholtz Zentrum München, Ingolstädter Landstrasse 1, 85764 Neuherberg, Germany

13 4. Bavarian NMR Center, Department of Chemistry, Technical University of Munich, Lichtenbergstr. 4, 85748  
14 Garching, Germany.

15 5. Department of Biology, College of Science, Salahaddin University-Erbil, Kirkuk Road, 44002 Erbil, Kurdistan  
16 Region, Iraq.

17 6. Department of Community Health, College of Health Technology, Cihan University-Erbil, 100 street, 44001  
18 Erbil, Kurdistan Region, Iraq.

19 7. Faculty of Chemical Engineering and Technology, Cracow University of Technology, Warszawska 24, 31-155,  
20 Poland.

21 8. Max Delbrück Center for Molecular Medicine in the Helmholtz Association, Berlin Institute for Medical Systems  
22 Biology, Berlin 13125, Germany.

23 9. Department of Analytical Chemistry and Biochemistry, Faculty of Materials Science and Ceramics, AGH  
24 University of Science and Technology, Mickiewicza 30, 30-059 Krakow, Poland.

25 10. Protein Crystallography Research Group, Malopolska Centre of Biotechnology, Jagiellonian University,  
26 Gronostajowa 7a, 30-387 Krakow, Poland.

27 11. Department of Analytical Biochemistry, Faculty of Biochemistry, Biophysics and Biotechnology, Jagiellonian  
28 University, Gronostajowa 7, 30-387 Krakow, Poland

29

30

31 \* co-senior and corresponding authors.

32

33

34 **Abstract**

35 Coronaviruses protect their single-stranded RNA genome with a methylated cap during replication. The capping  
36 process is initiated by several nonstructural proteins (nsp) encoded in the viral genome. The methylation is  
37 performed by two methyltransferases, nsp14 and nsp16 where nsp10 acts as a co-factor to both. Additionally,  
38 nsp14 carries an exonuclease domain, which operates in the proofreading system during RNA replication of the  
39 viral genome. Both nsp14 and nsp16 were reported to independently bind nsp10, but the available structural  
40 information suggests that the concomitant interaction between these three proteins should be impossible due to  
41 steric clashes. Here, we show that nsp14, nsp10, and nsp16 can form a heterotrimer complex. This interaction is  
42 expected to encourage formation of mature capped viral mRNA, modulating the nsp14's exonuclease activity, and  
43 protecting the viral RNA. Our findings show that nsp14 is amenable to allosteric regulation and may serve as a  
44 novel target for therapeutic approaches.

## 45 Introduction

46 The coronaviral genome is of positive polarity and serves as a substrate for the translational machinery of the cell  
47 after its release to the cytoplasm. The first and only product of the genomic mRNA translation is a large and non-  
48 functional 1a/1ab polyprotein. The polyprotein matures by autoproteolytic processing carried out by two viral  
49 SARS-CoV-2 proteases – main protease, M<sup>pro</sup> and papin-like protease, PL<sup>pro</sup>. This leads to the generation of a set  
50 of non-structural proteins (nsp), which are responsible for the viral replication process and remodeling of the  
51 intracellular environment. Once nsps reshape the cell to form a viral factory, the genomic RNA is copied and a set  
52 of subgenomic mRNAs is produced in a peculiar, discontinuous transcription process. These subgenomic mRNAs  
53 are monocistronic and serve as templates for the production of structural and accessory proteins required for the  
54 formation, assembly and release of progeny viruses<sup>1</sup>. The activity of particular nsps has been previously described,  
55 showing the complex network of interactions of multi-functional components. However, their coordinated action  
56 has not been fully understood.

57 Works by Gao *et al.*<sup>2</sup>, Yan *et al.*<sup>3</sup>, Wang *et al.*<sup>4</sup>, and Kabinger *et al.*<sup>5</sup> shed light on the scaffold of the replication  
58 complex formed by nsp12 (polymerase) and two co-factors nsp7 and nsp8, that create functional machinery able  
59 to replicate the viral RNA. Next, an extended elongation complex was described, where nsp12/7/8 is accompanied  
60 by nsp13 helicase. This complex is suggested to serve as the basic replication module<sup>6</sup>.

61 Coronaviruses are known for their large genomes, requiring high-fidelity replication to maintain their integrity.  
62 While the SARS-CoV-2 nsp12 polymerase is highly processive, it is error-prone and does not provide sufficient  
63 fidelity. It has been previously demonstrated that a proofreading system is encoded in coronaviral genomes<sup>7-9</sup>.  
64 Nsp14 carries an N-terminal exonuclease (ExoN) domain that serves in this role. ExoN is a member of the DEDDh  
65 exonuclease superfamily and exhibits 3'-5' exonuclease activity, removing incorrectly incorporated nucleotides  
66 from the 3' terminus of the newly formed RNA. ExoN has additionally been proposed to play a role during  
67 discontinuous replication of coronaviruses. Nsp14 has been shown to associate with the replicatory complex, with  
68 nsp10 as a co-factor, modulating and enhancing nsp14 exoribonuclease activity<sup>7-9</sup>.

69 Apart from the supporting role in replication, nsp14 has a second important function. It takes part in cap  
70 formation after genome copying is finalized<sup>7</sup>. Capping of viral mRNAs is essential for their function and integrity.  
71 It enables translation initiation and protects viral mRNA from recognition as foreign by cellular sensors, thereby  
72 preventing the induction of innate immune responses<sup>10</sup>. Cap formation is a tightly regulated process consisting of  
73 four consecutive enzymatic reactions. First, nsp13 triphosphatase removes the  $\gamma$ -phosphate of the 5'-triphosphate  
74 end (pppA)<sup>11,12</sup>; next, nsp12 guanylyltransferase (the nidovirus RdRp-associated nucleotidyltransferase, NiRAN  
75 domain)<sup>3</sup> transfers GMP to the 5' phosphate to form the core structure of the cap (GpppA); the GpppA is  
76 methylated at the N7 position by the nsp14 N7-methyltransferase domain (<sup>7</sup>MeGpppA); subsequently, ribose in the  
77 first ribonucleotide is methylated at the 2'-O-position by the nsp16 2'-O-methyltransferase<sup>13-15</sup>. Capping is  
78 regulated by nsp9, which binds nsp12 near the NiRAN active site<sup>16</sup>. The described process results in a functional  
79 cap (<sup>7</sup>MeGpppA<sub>2'OMe</sub>), completing the genome replication. While there is a good structural understanding of the  
80 interactions between nsp12, nsp13, and nsp14 during replication, nsp16 remains an orphan, and its methylation  
81 process is not fully understood.

82 Here, we studied the interaction between the two methyltransferases encoded in the genome of the  
83 coronavirus–nsp16 and nsp14. Both proteins bind to nsp10 and both are required for complete methylation.  
84 Therefore, their spatial proximity mediated by nsp10 would appear as beneficial for the methylation efficacy. Prior  
85 *in silico* analysis of structural information on nsp10/14 and nsp10/16 complexes suggested that simultaneous  
86 binding of both exonucleases to nsp10 should be impossible due to steric hindrance<sup>17</sup>. Interestingly, both nsp14  
87 and nsp16 interact with nsp10 by typical, well-defined protein-protein interfaces containing deep-reaching  
88 lipophilic residues and solvent-protected hydrogen bonds. The element that causes steric overlap between nsp14  
89 and nsp16 is a peculiar N-terminal “lid” domain of nsp14. This lid is mostly devoid of secondary structure and lacks  
90 characteristic protein-protein interaction complementarity. Interestingly, recent structures of nsp14 without  
91 nsp10 show massive rearrangement of the lid region confirming its structural flexibility<sup>18,19</sup>. This prompted us to  
92 postulate that a local structural rearrangement of the nsp14 N-terminal lid region is therefore required and  
93 possible, thus facilitating the heterotrimer complex formation.

94

## 95 Results

### 96 *Biochemical evidence of heterotrimer formation*

97 Nsp10, nsp14, and nsp16 were co-expressed in *E. coli* and purified. A single peak was obtained in size exclusion  
98 chromatography (SEC), indicating that all three proteins co-migrate (Fig 1a). Because no prior crosslinking was  
99 used, this result suggests the formation of a heterotrimer complex. Sodium dodecyl sulphate-polyacrylamide gel  
100 electrophoresis (SDS-PAGE) analysis of the peak containing the putative complex, together with mass  
101 spectrometry identification of components, indicates the presence of all three proteins (Fig. 1b). We further show  
102 that the putative complex migrates as a single major band in native PAGE (Extended Data Fig. 1a). When the band  
103 was excised from the gel and analyzed by SDS-PAGE, three bands were identified, corresponding in molecular  
104 weight to nsp14, nsp16, and nsp10 (Extended Data Fig. 1b). MS analysis of proteins contained in the major band  
105 derived from the native PAGE resulted in the identification of all three components of interest (Extended Data  
106 Table 1), further suggesting heterotrimer complex formation. LC-MS additionally allowed the assessment of the  
107 stoichiometry of the complex. By analyzing the signals at 254 and 280 nm, with further MS-based identification of  
108 the proteins under each UV chromatographic peak, stoichiometry was consistently established at 1.2:1:1  
109 (nsp10:nsp14:nsp16) (Extended Data Fig. 2 and Extended Data Table 2).

110 The kinetics of the heterotrimer complex formation were assessed by MicroScale Thermophoresis (MST).  
111 Nsp14 and nsp16 were separately expressed as histidine-tagged constructs and labeled with a high-affinity His-  
112 tag specific fluorophore dye. When labeled nsp14 was titrated with unlabeled nsp10, a dose-dependent increase  
113 in thermophoretic signal was observed, indicating an interaction with a  $K_d$  of  $2.4 \pm 0.2 \mu\text{M}$ , which is in the  
114 agreement with the previously reported affinity with a  $K_d$  of  $1.1 \pm 0.9 \mu\text{M}$ <sup>20</sup> (Fig. 1c). A comparable effect<sup>21</sup> was  
115 observed when labeled nsp16 was titrated with unlabeled nsp10 with a  $K_d$  of  $0.24 \pm 0.01 \mu\text{M}$ . Labeled nsp14 did  
116 not directly interact with unlabeled nsp16, but when labeled nsp14 was titrated with unlabeled nsp10/16 complex,  
117 a dose-dependent increase in thermophoretic signal was observed (Fig. 1c), which was interpreted as the  
118 heterotrimer complex formation. Fitting the experimental data allowed the determination of the  $K_d$  characterizing  
119 the interaction at  $0.28 \pm 0.01 \mu\text{M}$ .

120 To further characterize the heterotrimer complex and its components, we analyzed thermal denaturation  
121 profiles using nanoDSF. Each of the individual system components (nsp10, nsp14, and nsp16) was characterized  
122 by a single characteristic denaturation temperature (Fig. 1d), indicating that structures of the functional domains  
123 (if any) within particular components collapse in a coordinated manner upon temperature increase. Nsp16 was  
124 least temperature stable ( $T_m=45^\circ\text{C}$ ), while nsp10 ( $T_m=50^\circ\text{C}$ ) was most stable. However, the differences in melting  
125 temperatures were small, with all components demonstrating overall similar stability. Nsp14 was stabilized by the  
126 complex formation with nsp10 (nsp10/14 complex:  $T_m=55^\circ\text{C}$ ), while nsp10 binding did not significantly affect the  
127 thermal stability of nsp16 (nsp10/16 complex:  $T_m=45.5^\circ\text{C}$ ). The heterotrimer is characterized by a single sharp  
128 thermal denaturation peak with a characteristic melting temperature of  $51.7^\circ\text{C}$ . This temperature, distinctly  
129 different from that of any of the individual or binary-complexed components, gives a further evidence for the  
130 heterotrimer complex formation.  
131

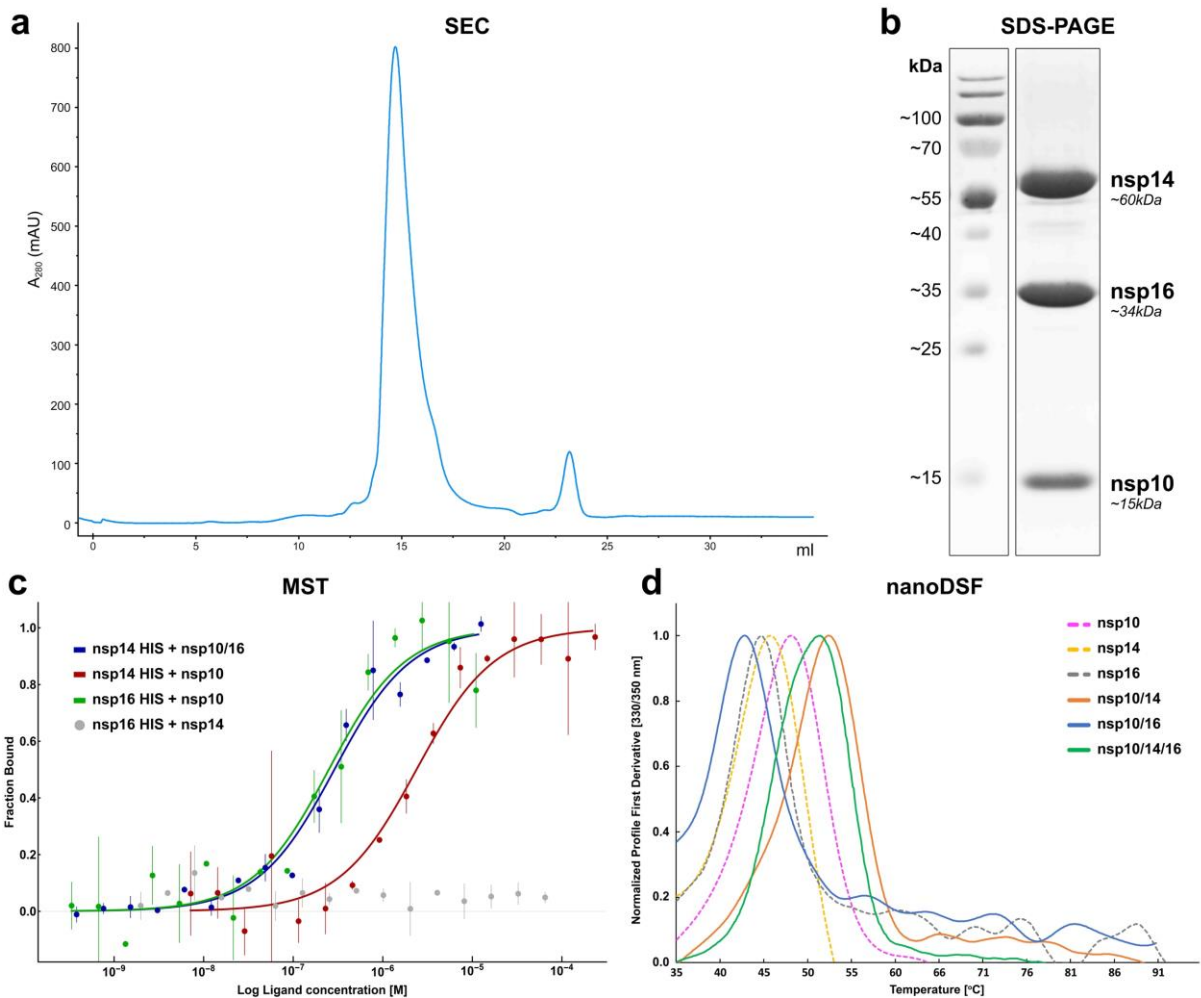

132 **Fig. 1 | In vitro formation of the nsp10/14/16 heterotrimer.** **a**, SEC chromatogram showing co-migration of nsp10, nsp14, and nsp16 proteins in a single peak at ~15  
133 mL. **b**, SDS-PAGE analysis of the major peak from panel **a**. Three major proteins corresponding in size to nsp10, nsp14, and nsp16 (Mw of 15, 60, and 33.5 kDa,  
134 respectively) are present in roughly equal quantities. **c**, MST analysis of the intra-complex affinities. Experimental data are represented as mean (dots) with error  
135 bars. Binding model fit is represented as a solid line. **d**, The melting profiles of heterotrimer complex and complex components, determined using nanoDSF.

132  
133  
134  
135  
136  
137

138 **Functional consequences of nsp10/14/16 heterotrimer complex formation**

139 GpppA is methylated at position N7 by nsp14 N7-methyltransferase domain, yielding N<sup>7</sup>MeGpppA<sup>22</sup>; SAM is used  
140 as a donor of the methyl group (Fig. 2a). Here, we tested whether the heterotrimer complex formation affects  
141 nsp14 catalyzed methylation. To follow the N7-methyltransferase activity of nsp14, we used an indirect assay to  
142 monitor changes in the level of a second reaction product, SAH, by HTRF. In the absence of one of the substrates  
143 (SAM or RNA) or the tested enzyme (negative controls), there was no activity validating the experimental setup  
144 (Extended Data Fig. 3a). Nsp14 showed no preference for the nascent nucleotide methylating both GpppG and  
145 GpppA, as demonstrated by the production of equal levels of SAH when using either nucleotide as a substrate (Fig.  
146 2b). The binary complex of nsp10/14 and the ternary complex N7-methyltransferase activities were comparable  
147 to that of nsp14 alone, indicating that binding to nsp10 or the heterotrimer complex formation had no significant  
148 influence on the N7-methyltransferase activity of nsp14. N7-methyltransferase activity was also not reported for  
149 N7-methylated substrate (O4 oligo - 5' (N7-MeGppp) ACA UUU GCU UCU GAC 3'). Nsp16, on the other hand,  
150 presenting 2'-O-methyltransferase activity in the complex with its obligatory partner nsp10 does not show a signal  
151 on non-methylated substrates and moderate activity on the O4-oligo substrate. Similarly to N7-methyltransferase  
152 activity, also 2'-O-methyltransferase activity is not affected by the heterotrimer complex formation. As expected,  
153 the pan-methyltransferase inhibitor sinefungin<sup>23</sup> halted methyltransferase activities of all reported here proteins.  
154 We have also tested if the nsp14 exoribonuclease (ExoN) activity affects methyltransferase activity by mutating  
155 the ExoN binding site. However, no difference in N7-methyltransferase activity was observed, decoupling those  
156 two activities from each other (Extended Data Fig. 3b). Alongside N7-methyltransferase activity, nsp14 harbors an  
157 ExoN domain characterized by exoribonuclease activity; an activity essential for proofreading during virus  
158 replication. However, *in vitro*, nsp14 is characterized by the high processivity and non-specifically degrades nucleic  
159 acids<sup>17,24,25</sup>. As the nuclease activity must be tightly controlled, we assessed whether the complex formation  
160 regulates this process. We evaluated the binding and nuclease activity of nsp10/14 and nsp10/16 compared to  
161 nsp10/14/16 with two synthetic RNAs of CoV-RNA1-G 5'-GGGGGGGGGGCGCGUAGUUUUUCUACGCG-3' and CoV-  
162 RNA1-A 5'-AAAAAAAAAACGCGUAGUUUUUCUACGCG-3'.

163 Addition of nsp10/14 and nsp10/16 (equimolar at 1.6 μM) results in the retardation of the RNA relative to an  
164 RNA only control, thus indicating a binding interaction between the RNA and protein heterodimers (Fig. 2c native  
165 gel, Extended Data Fig. 4). Interestingly, upon addition of nsp10/14/16 (equimolar at 1.6 μM), we observed  
166 increased retardation of the RNA-heterotrimer protein complex relative to the nsp10/14 and nsp10/16  
167 heterodimer complexes (Fig. 2c, native gel). The observed broadened band suggests that nsp10/14/16 forms a  
168 tetrameric complex with each of the RNA substrates.

169 As expected, addition of nsp10/14 results in the degradation of the RNA substrates (as indicated by the  
170 decreased intensity of the RNA band in the presence of protein relative to the RNA only control, observed both by  
171 native and non-denaturing gel analysis) (Fig. 2c, denaturing gel). Interestingly, we observed that the nuclease  
172 activity of nsp10/14 is reduced for the nsp10/14/16 heterotrimer, suggesting that nsp14 nuclease activity is  
173 modulated by nsp16 (Fig. 2c, denaturing gel). To assess this, we added increasing amounts of nsp16 to preformed  
174 nsp10/14 CoV-RNA1-A RNA complex and monitored the degradation of the RNA. Upon increasing the  
175 concentration of nsp16, the degradation activity of nsp14 is reduced, starting at a near 1:1 ratio (Fig. 2d). This  
176 effect is unlikely to be caused by the protective effect of RNA sequestering by the nsp16 as the RNA-nsp10/16

177 affinity is reported to be in high micromolar regime<sup>26</sup> (~100  $\mu$ M) and yet protective functions of nsp16 appear at  
 178 much lower protein concentrations equal to the nsp10/14 complex concentration. Recent crystallographic data  
 179 suggest that nsp14 exonuclease domain is controlled by lid rearrangement caused by nsp10 binding<sup>18</sup>. In  
 180 combination with our binding shift and degradation assays, this data suggests that binding of nsp10/16 to nsp14  
 181 causes additional allosteric change that inhibits unwanted exonuclease activity in favor of the methyltransferase  
 182 one.

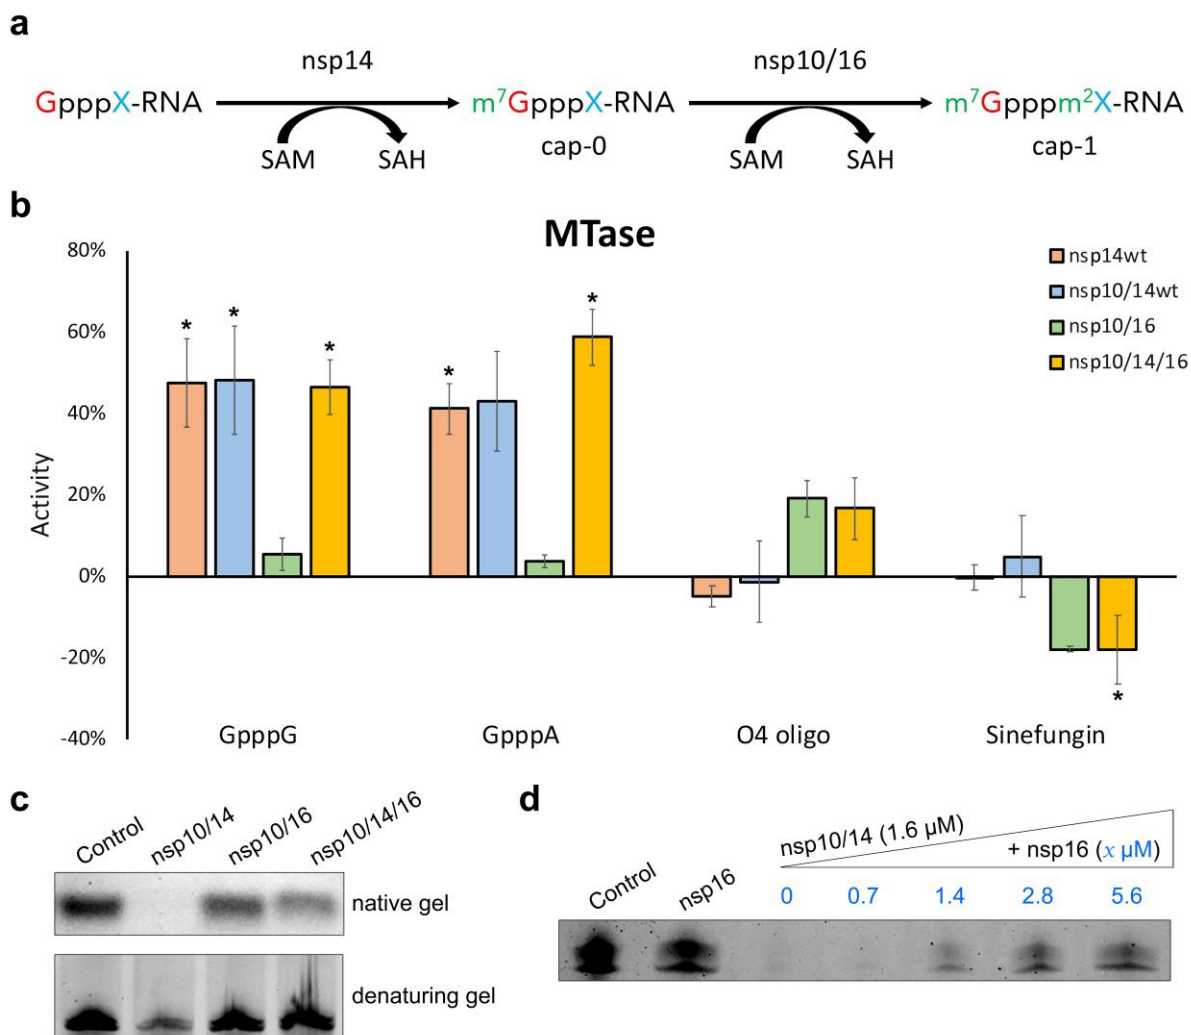

183  
 184 **Fig. 2| The formation of nsp10/14/16 heterotrimer modulates the ribonuclease, but not methyltransferase processivity.** **a**, Schematic view of mRNA methylation. X  
 185 represents a nascent nucleotide that could be adenine (A) or guanine (G). m<sup>7</sup> represents methylation of the first guanine at position N7 by nsp14. m<sup>2</sup> indicates 2'-O  
 186 methylation of the nascent mRNA nucleotide. **b**, Modulation of the methyltransferase activity by the protein partners. The results were normalized using the SAH  
 187 calibration curve and denoted  $\mu$ M of methylated product. All experiments were performed in duplicate. Average values with error bars (SD) are shown; \* p < 0.05 in  
 188 comparison to the condition with no activity. **c**, Analysis of RNA binding (native gel) and degradation (denaturing gel) potential of indicated nsp complexes. **d**,  
 189 Determination of stoichiometry of the heterotrimer complex limiting the exonuclease activity of nsp14. Titration of nsp10/14 (1.6  $\mu$ M) with indicated amounts of  
 190 nsp16 (blue). **(c, d)** CoV-RNA1-A was used as a substrate. Similar results are obtained for CoV-RNA1-G (Extended Data Fig. 4).

191

### 192 Lid hypothesis explains the nsp10/14/16 heterotrimer complex formation

193 A number of high-resolution crystal structures are available for the nsp10/14 and nsp10/16 complexes. Overlay of  
 194 the structures by a common component (nsp10) demonstrates that fifty N-terminal amino acids of nsp14 overlap  
 195 with nsp16 at the surface of nsp10. The significant steric clash produced by this overlap precludes the heterotrimer

196 complex assembly, which is mediated by the concomitant interaction of nsp14 and nsp16 with nsp10 (Fig. 3a-c).  
197 As such, the formation of the heterotrimer complex would require a significant structural rearrangement within  
198 either nsp14 or nsp16. Analysis of the interactions between nsp10, nsp14 and nsp16 suggests that the former  
199 binding surface contains a weakly interacting component – the N-terminal region of nsp14 (for rigorous analysis,  
200 see Discussion). We hypothesize that within the nsp10/14/16 heterotrimer complex, nsp16 displaces the N-  
201 terminal “lid” of nsp14 at the interface with nsp10.

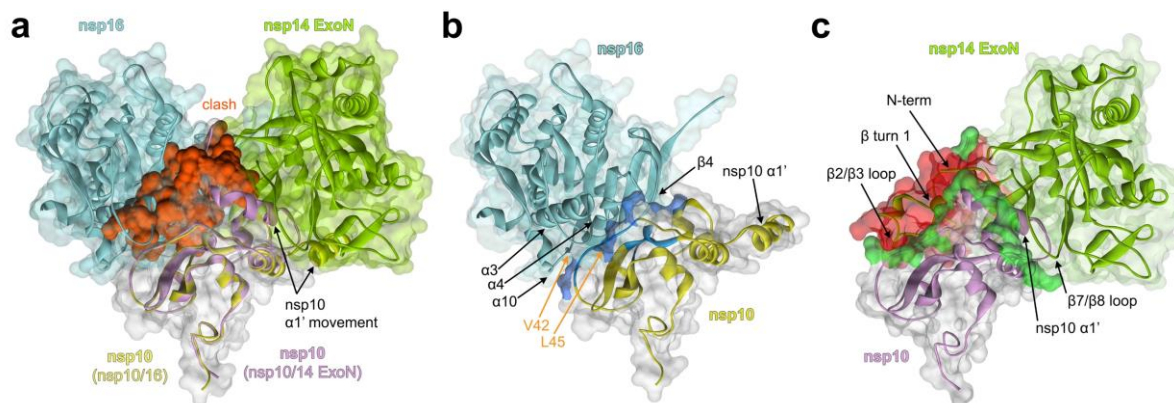

202 **Fig. 3 | In silico modelling of the nsp10/14/16 complex.** **a**, Nsp10-centered alignment of nsp10/16 (PDB ID: 6WVN) and nsp10/14 ExoN domain (PDB ID: 7DIY). Nsp16  
203 is shown in cyan, and the associated nsp10 is shown in yellow. nsp14 ExoN domain is shown in green and the associated nsp10 in purple. The structural clash  
204 between the nsp14 ExoN and nsp10/16 surfaces is shown in red. **b**, The interface between nsp10 and nsp16. The strong hydrophobic interaction between nsp10  
205 and nsp16 is shown in blue. The nsp10 residues V42 and L45 are shown as sticks. **c**, The interface between nsp10 and the nsp14 ExoN. The hydrogen bonds between  
206 nsp10 and nsp14 are shown in green. All panels: Different orientation of nsp10  $\alpha 1'$ -helices in respective complexes with nsp16 and nsp14 is shown. Arrows indicate  
207 major structural features constituting the interface.  
208  
209

210 To evaluate the above hypothesis, we created a “lid”-truncated mutant of nsp14 (nsp14 $\Delta$ ) missing the initial  
211 50 amino acids and evaluated its interaction with nsp10. Nsp14 $\Delta$  still formed a complex with nsp10, characterized  
212 by a  $K_d$  of 1.5  $\mu$ M. This value did not differ significantly from that characterizing the complex involving full length  
213 nsp14 ( $K_d=2.4 \mu$ M). The above data indicate that the interactions of the N-terminal region of nsp14 with nsp10 do  
214 not contribute significantly to the affinity of either component, indirectly supporting the “lid” rearrangement  
215 hypothesis in the heterotrimer complex formation.

216

### 217 *Structural characterization of the heterotrimer complex*

218 Nsp14, nsp10/14, nsp10/16 and nsp10/14/16 were characterized by SEC-SAXS<sup>15</sup>. The retention times of tested  
219 biomolecules correlate with theoretical molecular weights, assuming 1:1(:1) molar ratios<sup>16</sup> (Extended Data Fig. 5).

220 Guinier analysis of scattering profiles established that the largest radii of gyration ( $R_g$ ) characterized the  
221 heterotrimer complex ( $40.3 \pm 1.0 \text{ \AA}$ ). Nsp14 and the nsp10/14 complexes were characterized by significantly  
222 smaller  $R_g$ s ( $28.0 \pm 0.5$  and  $30.1 \pm 1.8 \text{ \AA}$ , respectively); the nsp10/16 complex was characterized by the smallest ( $R_g =$   
223  $21.0 \pm 1.5 \text{ \AA}$ ) (Extended Data Table 3). This data corresponds well with the expected molecular weights of tested  
224 complexes at 1:1:1 stoichiometry, further supporting the stoichiometry of the heterotrimer complex.

225 The estimated molecular weights of a scatterer differ from the expected values, perhaps as the result of the  
226 flexibility of the tested system (SAXS signal averages all conformations). Nonetheless, the relative values follow  
227 the expected pattern, with nsp10/16 characterized by the lowest and the nsp10/14/16 heterotrimer complex by  
228 the highest molecular weight, as determined by SAXS.



229 When reconstructed in real space using the indirect Fourier transform using software GNOM, the scattering  
230 profiles present roughly Gaussian shapes with significant tailing for nsp10/14/16 and nsp10/14, indicating an  
231 elongated globular nature for the protein complexes, with peaks overlapping with radii of gyration obtained using  
232 Guinier analysis. Calculated maximal distances within scatterers support the trend established above, with  
233 nsp10/16 constituting the smallest complex at 80.0 Å, nsp14 at 95.8 Å, nsp10/14 at 122.0 Å, and the nsp10/14/16  
234 at 140.0 Å (longest axis).

235 Molecular envelopes which best represent the scattering profiles were calculated using DAMMIF software<sup>27</sup>  
236 (Fig. 4). Crystal structures of nsp10/16, nsp14 and nsp10/14 and a model of the nsp10/14/16 heterotrimer  
237 complex, created assuming the “lid” hypothesis, were fitted into the envelopes using the SUPCOMB software. The  
238 crystal structures of nsp14 and nsp10/14 fit the molecular envelopes poorly, suggesting that these two remain  
239 flexible in solution (Fig. 4a and Fig. 4b). The structure of nsp10/16 fills the envelope tightly, suggesting complex  
240 rigidity in solution. The initial model of the heterotrimer complex already filled the envelope relatively well and  
241 was further optimized via normal mode analysis using the SREFLEX software<sup>28</sup>. SREFLEX rotates and translates rigid  
242 body domains of the input model within the constraints of flexible loops, optimizing the fit to the experimental  
243 scattering curve. The resulting heterotrimer model was characterized by a value of 1.08 for goodness-of-fit to the  
244 experimental SAXS data, suggesting a very likely solution. The model fits the envelope tightly, suggesting the  
245 rigidification of nsp14 structure upon the heterotrimer complex formation (comparing to nsp10/14 envelope fit).  
246 The decomposition of the nsp10/14/16 scattering profile into volume fractions calculated from the binary  
247 complexes nsp10/14, nsp10/16 crystal structures or extracted individual protein in the software Oligomer suggest  
248 that the signal can be divided 1:1 into nsp10/16 and nsp14 (Extended Data Table 3). This further implies that  
249 nsp10/16 interface within the nsp10/14/16 is retained, while it is nsp14 that undergoes structural rearrangements  
250 upon the heterotrimer complex formation.

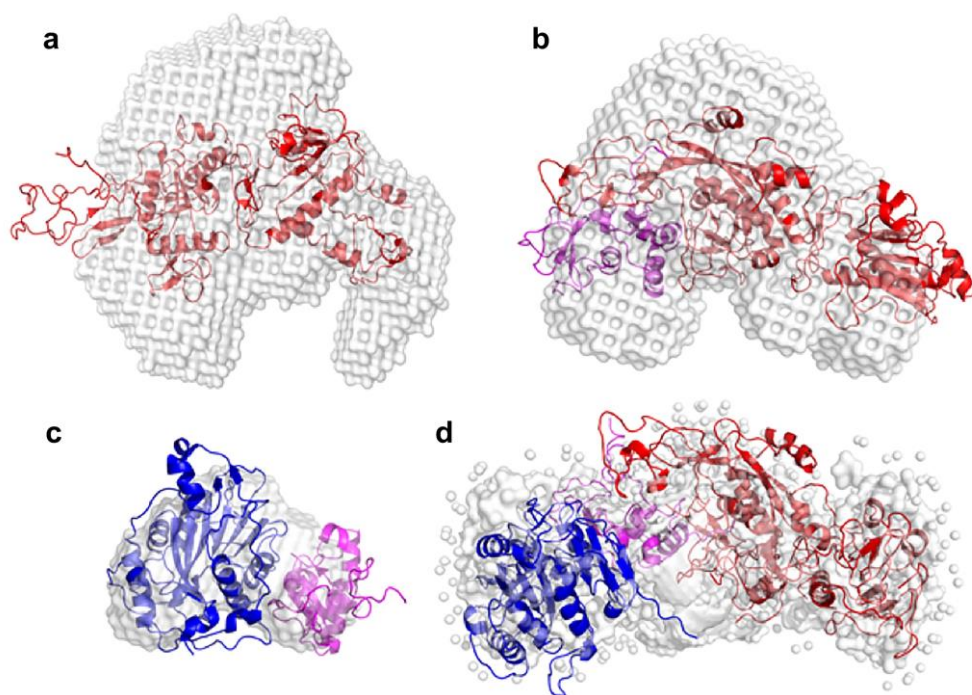

251

252 **Fig. 4 | Molecular envelopes representing the experimental SAXS scattering profiles** of nsp14 (a), nsp10/14 (b), nsp10/16 (c), nsp10/14/16 (d). Overlaid are best fits  
253 of crystallographic / theoretical models of relevant complexes. Color coding: nsp10 in magenta, nsp14 in red, nsp16 in blue, molecular envelopes in grey.

254 The heterotrimer complex formed by nsp10, nsp14 and nsp16 was further characterized by transmission  
255 electron microscopy. Negatively stained samples of a heterotrimer complex formed from full-length components  
256 yielded a non-homogenous particle distribution, which precluded structural analysis (Extended Data Fig. 6).  
257 However, when nsp14 methyltransferase domain was truncated out of the structure leaving nsp14 ExoN, the  
258 particle distribution became more homogenous, allowing the convergent classification (Fig. 5a) and structural  
259 analysis. The reconstruction obtained from the negative-stained transmission electron micrographs at 20 Å  
260 resolution shows elongated particles with approximate dimensions of  $\sim 10 \times 5 \times 4.5$  nm (Fig. 5b). Necking is evident  
261 in the center of the particles, indicating that two larger structural components are connected by a component of  
262 a lower molecular weight (nsp10). The SAXS-derived structural model of the heterotrimer complex fits the  
263 experimental NS-TEM map reasonably well with CCmask/CCbox of 0.59/0.80. Nsp14 ExoN and nsp16 fit the two  
264 globular regions of the map, connected by a region with a density corresponding to nsp10. The central cavity  
265 suggested by SAXS data is visible in the electron microscope-derived map, indicating an overall match between  
266 the 3D reconstitutions obtained using each method.

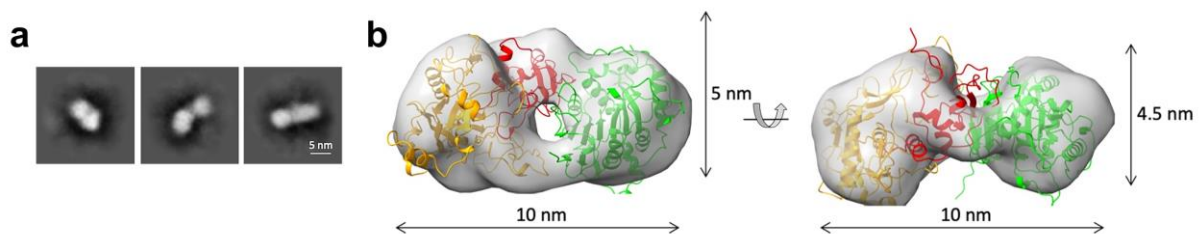

267  
268 **Fig. 5 | Transmission Electron Microscopy characterization of nsp10/14/16 complex.** a, Representative 2D-classes obtained by template-free 2D classification of  
269 particles picked from NS-TEM micrographs of nsp10/14/16 complex. b, Rigid body fit of SAXS-derived structure of the heterotrimer complex into NS-TEM-derived  
270 3D reconstruction map. Nsp14, nsp10, and nsp16 are represented as orange, red, and green ribbon models, respectively. The 3D reconstruction map is shown as a  
271 transparent grey surface.  
272

273

## 274 Discussion

275 It was demonstrated earlier that nsp10 serves as a protein co-factor of both nsp14 and nsp16. One might logically  
276 expect that nsp10 could bring nsp14 and nsp16 together into a heterotrimer complex and that the kinetics and  
277 processivity of the process would be positively influenced by the spatial proximity of enzymes catalysing  
278 consecutive reactions in the capping pathway. The crystal structures available to date, however, suggest  
279 otherwise. The binding interfaces of nsp14 and nsp16 overlap at the surface of nsp10, suggesting that the  
280 heterotrimer complex is not feasible without a major structural rearrangement of either nsp14 or nsp16.

281 Careful analysis of existing data demonstrates that the nsp10/16 interface relies on a solid network of  
282 hydrophobic interactions mediated by a rigid central antiparallel  $\beta$ 1-sheet of nsp10; the helices  $\alpha$ 2,  $\alpha$ 3 and  $\alpha$ 4; a  
283 coiled-coil region connecting helix  $\alpha$ 1 and the sheet  $\beta$ 1 and  $\alpha$  helices 3,4 and 10; as well as  $\beta$ -sheet 4 (Fig. 3b). In  
284 particular, Val42 and Leu45 of nsp10 are embedded into hydrophobic pockets formed by helices  $\alpha$ 3,  $\alpha$ 4, and  $\alpha$ 10  
285 of nsp16.

286 Despite the fact that the interface between nsp10 and nsp14 buries a larger surface area compared to the  
287 nsp10/16 interface, the affinity characterizing the components of the former complex is almost an order of  
288 magnitude weaker than that of the latter. This prompted us to speculate that a significant part of the nsp10/14  
289 interaction may not significantly contribute to affinity. The nsp10/14 interaction surface contains two major

290 regions. Interactions within the N-terminal region of nsp14 involve primarily loops and other poorly structured  
 291 regions, such as the N-terminal coil-coiled region that interacts with the  $\alpha 1'$  helix of nsp10,  $\beta$ -turn 1, and loops  
 292 between  $\beta$ -sheet 2/3 and  $\beta$ -sheet 7/8 (Fig. 3c). Many of those interactions are present within the region that would  
 293 overlap with nsp16 if the complexes were aligned. Indeed, nsp14 $\Delta$  retains nsp10 binding properties and is  
 294 characterized by an affinity comparable to wild type nsp14, supporting the claim that the N-terminal region does  
 295 not significantly contribute to interaction. This allowed us to hypothesize that the heterotrimer complex is formed  
 296 when nsp16 displaces the N-terminal region ("lid") of nsp14 at the surface of nsp10 (Fig. 6). Indeed, both nsp14  
 297 and nsp14 $\Delta$  readily form a heterotrimer complex with nsp16 and nsp10.

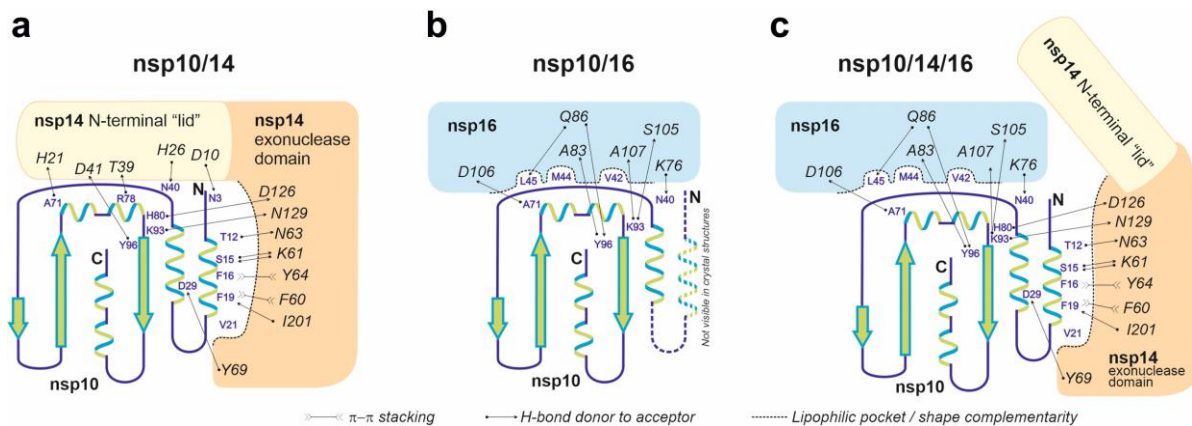

298  
 299 **Fig. 6 | Schematic diagram of interactions guiding the affinities of nsp10, nsp14 and nsp16.** **a.** The  $\alpha 1$  helix of nsp10 provides several deeply buried lipophilic and  $\pi$ -  
 300  $\pi$ -stacking interactions with the exonuclease domain of nsp14 and the interaction may be described in terms of shape complementarity. In turn, the interaction of  
 301 the N-terminal "lid" region (amino acids 1-50) of nsp14 with nsp10 shows poor shape complementarity and is characterized only by a low number of solvent-  
 302 exposed hydrogen bonds. **b.** Nsp16 binds nsp10 at the site overlapping that involved in binding of the "lid" of nsp14, but nsp10/16 interaction is characterized by  
 303 a well-developed interface involving deep lipophilic pockets and solvent-shielded hydrogen bonds. The  $\alpha 1$  helix of nsp10 is not defined in the crystal structures of  
 304 the nsp10/16 complexes (6W4H, 6Y21), indicating it is flexible and not involved in binding. **c.** The formation of the nsp10/14/16 heterotrimer complex is  
 305 accompanied by "lid" displacement and stabilization of the  $\alpha 1$  helix.  
 306

307 The "lid" hypothesis is supported by low-resolution structural data provided in this work. The gyration radii  
 308 and molecular weight of the heterotrimer complex derived from SEC-SAXS experiments are higher than the  
 309 gyration radii and molecular weights of any of the components or binary complexes (Extended Data Fig. 5a). The  
 310 molecular envelope derived *ab initio* from the scattering profile of the heterotrimer complex perfectly fits the  
 311 model suggested by the "lid" hypothesis. Additionally, SAXS demonstrates that the heterotrimer complex  
 312 formation stabilizes conformational flexibility of the nsp10/14 complex.

313 NS-TEM reconstruction of 3D volume characterizing the nsp10/14 $\Delta$ /16 heterotrimer complex accommodates  
 314 the SAXS-derived model with high confidence, further supporting the lid hypothesis. We were unsuccessful in our  
 315 effort to use cryoEM to determine a high-resolution structure of the heterotrimer complex composed of full-  
 316 length components due to low particle homogeneity. Low resolution reconstruction was nonetheless possible and  
 317 again accommodated the SAXS derived model well (Extended Data Fig. 7), further supporting the structural  
 318 arrangement of the components within the heterotrimer complex.

319 Overall, in this study we provide evidence that nsp14, nsp10 and nsp16 form a heterotrimer complex  
 320 characterized by 1:1:1 stoichiometry, built around nsp10. The architecture of the complex follows the general  
 321 arrangement previously observed in nsp10/16 and nsp10/14 complexes, but nsp16 displaces the "lid" (N-terminal)  
 322 of nsp14 at the nsp10 surface (Fig. 6). The heterotrimer complex brings together two consecutive activities  
 323 required for RNA cap formation (nsp14 associated N7-methyltransferase and nsp16 2'-O-methyltransferase), likely

324 contributing to the processivity of the capping process. The heterotrimer complex formation does not, however,  
325 influence the methyltransferase activities. Further, the heterotrimer complex formation mitigates the 3'→5'  
326 exonuclease activity of nsp14, preventing the excessive degradation of viral nucleic acid and allowing the complex  
327 to switch from the proofreading mode to the methylation mode.

328

329

## 330 **Materials and Methods**

### 331 ***Protein expression and complex purification***

332 Constructs of nsp10, comprising amino acids 4254 – 4392, nsp14, comprising amino acids 5926 – 6452, and nsp16,  
333 comprising amino acids 6799 – 7096, of SARS-CoV-2 polyprotein 1ab optimized for expression in *E. coli* were  
334 ordered from GeneArt and subcloned into expression vector pETDuet-1. For the nsp14 catalytic mutant (np14-  
335 cat), D90 and E92 were replaced with alanines<sup>29</sup>. Plasmids were then co-transformed into *E. coli* strain BL21.

336 Transformed BL21 (DE3) *E. coli* cells were grown in Terrific Broth medium (TB; Bioshop), supplemented with  
337 100 µg/ml of ampicillin (Sigma), at 37°C overnight and used as a starter culture for the large-scale expression in  
338 TB. After the culture reached OD<sub>600</sub>=1.2 – 1.4, it was induced with 0.5mM isopropyl-D-1-thiogalactopyranoside  
339 (IPTG; Sigma), and protein expression was carried out at 18 °C for 16 hours. Bacterial pellets were collected by  
340 centrifugation at 6'000 rpm for 10 min at 4°C, resuspended in lysis buffer (50 mM Tris-HCl pH 8.5, 300 mM NaCl,  
341 5 mM MgCl<sub>2</sub>, 5% v/v glycerol, 5 mM β-mercaptoethanol) and disrupted by sonication at 80% amplitude for 15 min  
342 at 10°C (3s, 3s pulse). The lysed sample was clarified by centrifuging for 1 h at 25'000 rpm at 4°C. The supernatant  
343 was collected and incubated with 2 ml of Ni-NTA Agarose (Jena Bioscience) pre-equilibrated with the lysis buffer  
344 for 2 hours at 4°C. Purification was carried out in a gravity-flow column. Resin was washed with 50 BV (bed volume)  
345 of buffer A (50 mM Tris-HCl pH 8.5, 300 mM NaCl, 5 mM MgCl<sub>2</sub>, 5 mM β-mercaptoethanol, 10 mM imidazole) and  
346 20 BV of buffer B (50 mM Tris-HCl pH 8.5, 300 mM NaCl, 5 mM MgCl<sub>2</sub>, 5 mM β-mercaptoethanol, 20 mM  
347 imidazole). The protein complex was eluted with buffers C, D and E (50 mM Tris-HCl pH 8.5, 150 mM NaCl, 5 mM  
348 MgCl<sub>2</sub>, 5 mM β-mercaptoethanol, 100 mM (C) / 250 mM (D) / 350 mM imidazole (E), 5 × 2 BV each). The eluted  
349 fractions were concentrated to 5 ml and loaded onto a HiLoad 26/600 Superdex 200 prep grade (GE Healthcare)  
350 equilibrated with the SEC buffer (50 mM Tris-HCl pH 8.5, 150 mM NaCl, 5 mM MgCl<sub>2</sub>, 2 mM β-mercaptoethanol).  
351 Confirmed by SDS-PAGE, the protein complex fractions were collected. TEV protease was added in a combination  
352 of a final concentration of 10 mM β-mercaptoethanol and incubated with gentle rocking at 4°C for approximately  
353 12h. When the His-tag had been successfully cleaved from the protein complex, the sample was concentrated to  
354 5 ml and loaded over the HiLoad 26/600 Superdex 200 prep grade (GE Healthcare). In order to clear the impurities  
355 which had been eluted with the complex, a reverse binding was performed by incubating for 15 minutes, rolling  
356 at 4°C with 100 µl of Ni-NTA Agarose (GE Healthcare) pre-equilibrated with the SEC buffer. The sample was  
357 separated with a gravity-flow column, and the Ni-NTA agarose was washed three times with the SEC buffer with  
358 150 mM NaCl and finally with SEC buffer supplemented with another 150 mM NaCl (totaling 300 mM NaCl). The  
359 flow-through samples contained the clean protein complex, as verified by SDS-PAGE. The protein complex was  
360 collected, concentrated, and loaded onto the Superdex 200 Increase 10/300 GL (GE Healthcare) equilibrated with  
361 the final SEC buffer (20 mM HEPES pH 7.5, 150 mM NaCl, 5 mM MgCl<sub>2</sub>, 2 mM β-mercaptoethanol). The protein

362 complex was collected and concentrated up to 5 mg/ml for further applications such as crystallization, inhibitor  
363 and activity screening. After every stage of purification, the protein content and purity were evaluated with SDS-  
364 PAGE and InstantBlue (Sigma) gel staining (Extended Data Fig. 1c).

365

#### 366 ***Protein identification from gel bands - LC-MS/MS analysis***

367 Protein identification was performed at the Proteomics and Mass Spectrometry Core Facility, Malopolska Centre  
368 of Biotechnology, Jagiellonian University, Krakow. Samples were prepared, measured and analyzed as described  
369 in Pabis *et al.*<sup>30</sup> with minor changes. Briefly, gel bands were destained by alternating washing with 25% and 50%  
370 acetonitrile (ACN) in 25 mM ammonium bicarbonate (ABC). Then, protein reduction was performed with 50 mM  
371 DTT in 25 mM ABC (45 min of incubation at 37°C) followed by alkylation with 55 mM iodoacetamide (1 h of  
372 incubation at room temperature in the dark). In the next steps, gel bands were washed with 50% ACN in 25 mM  
373 ABC, dehydrated in 100% ACN, dried and rehydrated in 20 µl of trypsin solution (10 ng/µl in 25 mM ABC). After  
374 rehydration, 40 µl of 25 mM ABC was added and samples were left for overnight incubation at 37°C. Protein  
375 digestion was stopped by adding trifluoroacetic acid (TFA) to the concentration of about 0.5%. Peptides present  
376 in the solution were collected and additionally extracted from the gel by dehydration with 100% ACN. The obtained  
377 peptide mixtures were dried and suspended in a loading buffer (2% ACN with 0.05% TFA) for LC-MS/MS analysis,  
378 carried out with a nanoHPLC (UltiMate 3000 RSLCnano System, Thermo Fisher Scientific) coupled to a Q Exactive  
379 mass spectrometer (Thermo Fisher Scientific). Peptides were loaded onto a trap column (Acclaim PepMap 100  
380 C18, 75 µm × 20 mm, 3 µm particle, 100 Å pore size, Thermo Fisher Scientific) at a flow rate of 5 µl/min and  
381 separated on an analytical column (Acclaim PepMap RSLC C18, 75 µm × 500 mm, 2 µm particle, 100 Å pore size,  
382 Thermo Fisher Scientific) at 50°C with a 60 min gradient of ACN, from 2% to 40%, in the presence of 0.05% formic  
383 acid at a flow rate of 250 nl/min. The eluting peptides were ionized in a Digital PicoView 550 nanospray source  
384 (New Objective) and measured with Q Exactive operated in a data-dependent mode. A Top8 method was used  
385 with 35 s of dynamic exclusion. MS and MS/MS spectra were acquired with a resolution of 70'000 and 35'000,  
386 respectively. The ion accumulation times were adjusted to ensure parallel filling and detection. The acquired LC-  
387 MS/MS data were processed with the use of Proteome Discoverer platform (v.1.4; Thermo Scientific) and searched  
388 with an in-house MASCOT server (v.2.5.1; Matrix Science, London, UK) against the database of common protein  
389 contaminants (cRAP database) with manually added sequences for the proteins of interest. The following  
390 parameters were applied for the database search: enzyme: trypsin; missed cleavages: up to 1; fixed modifications:  
391 carbamidomethyl (C); variable modifications: oxidation (M); peptide mass tolerance: 10 ppm; fragment mass  
392 tolerance: 20 mmu. Additionally, the SwissProt database, restricted to *E. coli* taxonomy, was searched to assess  
393 contamination with host proteins.

394

#### 395 ***Stoichiometry determination***

396 For protein quantitation, sample separation was carried out following a simple protocol using the Prominence  
397 HPLC system (2×LC-20AD pumps, SPD-M20A diode array detector, DGU-20 degasser, all from Shimadzu Corp.,  
398 Kyoto, Japan). For gradient separation, a Kinetex 2.6 µm/100A C18 100 mm/2.1 mm ID HPLC column was used  
399 (00D-4462AN, Phenomenex, Torrance, CA, USA). Solvents used for separation: A = water + formic acid (99.9:0.1,

400 v/v), B = acetonitrile + formic acid (99.9:0.1, v/v). All solvents were supplied by Merck local distributor (Merck  
401 KgaA, Darmstadt, Germany). Gradient was set as follows: t (time)=0 min, 25% B; t=20 min, 75% B; t=20.5 min, 90%  
402 B; t=25 min, 90% B; t=25.5 min, 25% B; t=35 min, 25% B (end). Flow rate was set to 0.3 ml/min. Diode array  
403 detector settings: wavelength range: 200-350 nm (deuterium lamp only), sampling frequency: 5 Hz. Data  
404 acquisition and data processing were controlled by LCsolution software, ver. 1.25 (Shimadzu Corp., Kyoto, Japan).  
405 To confirm protein content under every chromatographic peak taken for protein quantitation, mass spectrometry-  
406 based identification was used. The protocol for protein identification, applied with minor changes, is available  
407 elsewhere<sup>31</sup>. Briefly, fractions acquired during protein separation were freeze-dried using CentriVap system  
408 (Labconco, Kansas City, MO, USA) and redissolved in 70  $\mu$ l 50 mM ABC (pH=7.8). Next, reduction and alkylation of  
409 cysteine residues were done using DTT and following iodoacetamide 50 mM ABC solutions (both reagents: 5 mM  
410 final concentrations). In both cases, 10 min incubation in 80°C with shaking was applied. After cooling down,  
411 trypsin (Gold-MS grade, Promega, Madison, WI, USA) was added in a final concentration of 2 pmol per sample.  
412 Samples were incubated overnight at 37°C with shaking, then freeze-dried again and redissolved in 30  $\mu$ l of 4%  
413 acetonitrile/water solution acidified by 0.1% formic acid (v/v/v). NanoLC-MS/MS analyses were performed on an  
414 Ultimate 3000 system (Thermo, Waltham, MA, USA) connected on-line to AmaZon SL, equipped with nanoFlowESI  
415 ion source (Bruker-Daltonics, Bremen, Germany). Parameters of nanoLC system: column Acclaim PepMap100,  
416 C18, l=10 cm/75  $\mu$ m I.D., precolumn PepMap100, C18, l=1 cm/1 mm I.D., gradient settings: solvent A = water with  
417 0.1% formic acid (v/v), solvent B = acetonitrile with 0.1% formic acid (purity: MS-grade; Merck KGaA, Darmstadt,  
418 Germany), t (time)=0 min, 6% B; t=5 min, 6% B; t=50 min, 55% B; t=50.1 min, 80% B; t=53 min, 80% B; t=54 min,  
419 6% B; t=58 min, 6% B (end). Sample injection volume was usually in the range 3-5  $\mu$ l. Flow rate: 300 nl/min, flow  
420 rate for sample introduction on precolumn: 30  $\mu$ l/min. Mass spectrometer settings were as follows: capillary  
421 voltage: 4'200V; heated capillary temperature: 150°C; MS scan range: 375-1600 m/z; MS/MS scan range: 200-  
422 2000 m/z; resolution: enhanced; scanning frequency: ca. 1 Hz; ICC (Ion Charge Control): 250'000 ions/trap cycle;  
423 fragmentation ions selection range: 450-1'600 m/z (with minor exclusions); minimal ion intensity selected for  
424 fragmentation: at least  $1 \times 10^6$  units. Both instruments were run under the HyStar ver. 4.1 SR1 (Bruker-Daltonics,  
425 Bremen, Germany). Data analysis was performed in Bruker's Compass DataAnalysis 4.4 SR1. Acquired data were  
426 converted into mgf files using built-in scripts, introduced into Mascot search engine (ver. 2.6, Matrixscience,  
427 London, UK), and searched against SwissProt and in-house created database. Mascot settings: enzyme: trypsin;  
428 missing cleavages: 1; taxonomy: all; fixed modifications: carbamidomethylation; variable modifications: oxidation-  
429 Met; peptide tolerance: 1.2 Da; #13C: 1; MS/MS tolerance: 0.6 Da; peptide charge: +1,+2,+3; instrument: ion-trap.

430

### 431 *MicroScale Thermophoresis*

432 His-tag proteins were labeled with Monolith His-Tag Labeling Kit RED-tris-NTA 2nd Generation according to  
433 manufacturer's guidelines. Labeled proteins were diluted in PBS containing 0.05% Tween-20 up to 80 nM  
434 concentration and mixed with tested ligands. Samples were allowed 30 min incubation at RT prior measurements.  
435 Measurements were performed on Monolith NT.115 in duplicates using Excitation Power: 80% and MST Power:  
436 high in Monolith NT.115 Capillaries.

437

438 ***NanoDSF***

439 NanoDSF was performed in standard capillaries using Tycho equipment. Proteins and their respective complexes  
440 were measured at 1 mg/mL using default ramp temperature. The resulting melting temperatures were reported  
441 as the first derivative of the fluorescence ratio.

442

443 ***Methyltransferase activity***

444 The methyltransferase activity of wild type heterotrimer nsp10/14/16 or the heterotrimer with mutated nsp14  
445 protein (ExoN mutant and catalytic mutant – D90A and E92A) was measured using the EPIgeneous  
446 Methyltransferase kit from Cisbio as previously described<sup>32</sup>. Individual kit reagents were reconstituted according  
447 to the manufacturer's instructions. Briefly, the methyltransferase reaction was incubated for 20 minutes at room  
448 temperature in 8  $\mu$ l reaction volume with 100 nM nsp10/14/16 wild type or mutated heterotrimer, 1  $\mu$ M Ultrapure  
449 SAM (Cisbio), 187.5  $\mu$ M RNA cap analogue (GpppA or GpppG, New England Biolabs) or 18.75  $\mu$ M Cap 0 RNA oligo  
450 (TriLink) in reaction buffer consisting of 20 mM Tris-HCl pH 7.4, 150 mM NaCl, and 0.5 mM DTT. The reaction was  
451 quenched by the addition of 2  $\mu$ l of 5M followed by the addition of 2  $\mu$ l Detection Buffer 1 (Cisbio) to the reaction  
452 mixture. After 10 min, 4  $\mu$ l of 16 $\times$  SAH-d2 conjugate solution (Cisbio) was added. After 5 min, 4  $\mu$ l of 1 $\times$   $\alpha$ -SAH Tb  
453 Cryptate antibody solution was added to the reaction mixture and incubated for 1 hour at room temperature.  
454 Homogenous Time-Resolved Fluorescence (HTRF) measurements were performed on a SpectraMax iD5 plate  
455 reader (Molecular Devices) according to the manufacturer's guideline (excitation wavelength 340 nm, emission  
456 wavelengths 665 and 620 nm, top mode, 100 flashes, optimal gain, z position calculated from the negative control  
457 (no enzyme), lag time of 60  $\mu$ s and the integration time of 500  $\mu$ s). The resulting data were background-subtracted  
458 and normalized as follows. The ratio of 665 to 620 nm wavelength was calculated. The data was background-  
459 corrected on the averaged signal for the buffer control. Next, the data was normalized for each series individually  
460 on the wells not containing the enzyme.

461

462 ***Binding and exonuclease activity assays***

463 Substrate for binding and exonuclease assays had a primary Sequence (5' to 3') of CoV-RNA1-X (X = G, or A)  
464 XXXXXXXXXXXCGCGUAGUUUUCUACGCG. The CoV-RNA1-A and G RNAs were ordered from IDT as a PAGE-purified  
465 and desalted oligos. Protein complexes (equimolar at 1.6  $\mu$ M) were incubated with 100 ng of RNA in a buffer  
466 containing 20 mM HEPES pH 7.5, 100 mM NaCl, 5% v/v glycerol, 10 mM MgCl<sub>2</sub>, and 5 mM  $\beta$ -mercaptoethanol,  
467 followed by analysis via a 20% urea-denaturing PAGE or a native 1% TBE agarose gel.

468

469 ***SAXS***

470 Samples were measured in SEC-SAXS mode at BM29/ESRF, Grenoble France on 12.12.2020. (session ID MX2341).  
471 Samples (100  $\mu$ L) were measured on Agilent AdvanceBio SEC 300 with 50mM Tris-HCl pH 8.5, 150mM NaCl, 5mM  
472 MgCl<sub>2</sub>, and 2 mM  $\beta$ -mercaptoethanol running phase at 0.16 ml/min flowrate. The measurements were performed  
473 at 0.99  $\text{\AA}$  wavelength. The sample to detector distance was set at 2.83 m with Pilatus2M detector for data  
474 acquisition.

475

## 476 *CryoEM*

477 Out of 100 randomly chosen micrographs, 1'000 particles were manually picked without any structural knowledge  
478 about the complex to minimize bias and assigned with 2D classes that were used in the *ab initio* model built. Out  
479 of generated 3D classes, one was manually picked and used for the training of TOPAZ neural networks, which in  
480 turn picked the next interaction of particles that were used to retrain Topaz. With this approach, approximately  
481 0.5 M particles were selected to generate 50 2D classes, out of which 19 were manually picked.

482

## 483 *Crosslinking and Negative-Staining Transmission Electron Microscopy*

484 Following SEC in HEPES buffer, the purified protein complex was crosslinked with bis(sulfosuccinimidyl)suberate  
485 (BS<sup>3</sup>, Thermo Scientific), an amine-to-amine crosslinker. The protein sample was incubated with 0.5 mM BS<sup>3</sup> (from  
486 50 mM stock) for 30 min at RT. The crosslinking reaction was quenched with 1M Tris pH 7.5 to a final 50 mM Tris,  
487 and incubated 15 min at RT. The excess BS<sup>3</sup> crosslinker was cleared by sequential dilution and concentration with  
488 Tris buffer. Concentrated samples were kept at 4°C or stored at -80°C for further measurements. Negative-stain  
489 transmission electron microscopy (NS-TEM) measurements were done in Formvar/carbon-supported 400 mesh  
490 copper grids, suspended in air with a negative lock tweezer. The purified protein complex (0.03 mg/mL) was  
491 applied on glow-discharged Formvar/carbon-supported 400 mesh copper grids and negatively stained with 1%  
492 neutralized uranyl-acetate. Grids were imaged using the JEOL JEM 2100HT electron microscope (Jeol Ltd, Tokyo,  
493 Japan) at accelerating voltage 200 kV. Images were taken by using a 4kx4k camera (TVIPS) equipped with EMMENU  
494 software ver. 4.0.9.87.

495

## 496 *Image processing and 3-D reconstitution*

497 Collected micrographs were processed using cryoSPARC 3.1.1. Initially, 9'350 particles were picked from  
498 micrographs using Blob Picker. Picked particles were subjected to a template-free 2D classification, from which  
499 1'216 particles were selected and subjected to 3D reconstitution using the *ab-initio* reconstitution job. The  
500 nsp10/14/16 complex map derived from SAXS data was used for a rigid-body fit in to 3D-reconstitution map using  
501 Dock in map.

502

## 503 **Acknowledgements**

504 This work was supported by a subsidy from the Polish Ministry of Science and Higher Education for research on  
505 SARS-CoV-2 and a grant from the National Science Center (UMO-2017/27/B/NZ6/02488) and by EU-Horizon2020  
506 ITN OrganoVir grant 812673 to K.P., and by the Bayerische Forschungstiftung grant AZ-1453-20C to G.P and M.S.  
507 and a DFG Grant PO 1851/4-1 "Biochemische und strukturelle Charakterisierung des SARS-CoV-2 non-structural  
508 protein 16 (nsp16), eine cap ribose 2'O-methyltransferase." to G.P. and M.S. The mass spectrometry was also  
509 partially financed from the subsidy no 16.16.160.557 of the Polish Ministry of Science and Education to P.S. and  
510 K.H.. J.P. is a recipient of the START fellowship from the Foundation for Polish Science (FNP). We are grateful to  
511 Local Contact at the ESRF for providing assistance in using beamline BM29. We acknowledge the MCB Structural  
512 Biology Core Facility (supported by the TEAM TECH CORE FACILITY/2017-4/6 grant from the Foundation for Polish



513 Science) for valuable support. We acknowledge SOLARIS National Synchrotron Radiation Centre for the access to  
514 the cryo-EM Facility, where the measurements were performed.

515

## 516 Declaration of interests

517 None.

518

## 519 REFERENCES

- 520 1 Pyrc, K., Jebbink, M. F., Berkhout, B. & van der Hoek, L. Genome structure and transcriptional  
521 regulation of human coronavirus NL63. *Virology* **1**, 7, doi:10.1186/1743-422X-1-7 (2004).
- 522 2 Gao, Y. *et al.* Structure of the RNA-dependent RNA polymerase from COVID-19 virus. *Science*  
523 **368**, 779-782, doi:10.1126/science.abb7498 (2020).
- 524 3 Yan, L. *et al.* Cryo-EM Structure of an Extended SARS-CoV-2 Replication and Transcription  
525 Complex Reveals an Intermediate State in Cap Synthesis. *Cell* **184**, 184-193 e110,  
526 doi:10.1016/j.cell.2020.11.016 (2021).
- 527 4 Wang, Q. *et al.* Structural Basis for RNA Replication by the SARS-CoV-2 Polymerase. *Cell* **182**,  
528 417-428 e413, doi:10.1016/j.cell.2020.05.034 (2020).
- 529 5 Kabinger, F. *et al.* Mechanism of molnupiravir-induced SARS-CoV-2 mutagenesis. *Nat Struct*  
530 *Mol Biol* **28**, 740-746, doi:10.1038/s41594-021-00651-0 (2021).
- 531 6 Yan, L. *et al.* Coupling of N7-methyltransferase and 3'-5' exoribonuclease with SARS-CoV-2  
532 polymerase reveals mechanisms for capping and proofreading. *Cell* **184**, 3474-3485 e3411,  
533 doi:10.1016/j.cell.2021.05.033 (2021).
- 534 7 Sevajol, M., Subissi, L., Decroly, E., Canard, B. & Imbert, I. Insights into RNA synthesis, capping,  
535 and proofreading mechanisms of SARS-coronavirus. *Virus Res* **194**, 90-99,  
536 doi:10.1016/j.virusres.2014.10.008 (2014).
- 537 8 Bouvet, M. *et al.* RNA 3'-end mismatch excision by the severe acute respiratory syndrome  
538 coronavirus nonstructural protein nsp10/nsp14 exoribonuclease complex. *Proc Natl Acad Sci*  
539 *U S A* **109**, 9372-9377, doi:10.1073/pnas.1201130109 (2012).
- 540 9 Eckerle, L. D., Lu, X., Sperry, S. M., Choi, L. & Denison, M. R. High fidelity of murine hepatitis  
541 virus replication is decreased in nsp14 exoribonuclease mutants. *J Virol* **81**, 12135-12144,  
542 doi:10.1128/jvi.01296-07 (2007).
- 543 10 Daffis, S. *et al.* 2'-O methylation of the viral mRNA cap evades host restriction by IFIT family  
544 members. *Nature* **468**, 452-456, doi:10.1038/nature09489 (2010).
- 545 11 Ivanov, K. A. *et al.* Multiple enzymatic activities associated with severe acute respiratory  
546 syndrome coronavirus helicase. *J Virol* **78**, 5619-5632, doi:10.1128/JVI.78.11.5619-5632.2004  
547 (2004).
- 548 12 Ivanov, K. A. & Ziebuhr, J. Human coronavirus 229E nonstructural protein 13: characterization  
549 of duplex-unwinding, nucleoside triphosphatase, and RNA 5'-triphosphatase activities. *J Virol*  
550 **78**, 7833-7838, doi:10.1128/JVI.78.14.7833-7838.2004 (2004).
- 551 13 Decroly, E. *et al.* Coronavirus nonstructural protein 16 is a cap-0 binding enzyme possessing  
552 (nucleoside-2'O)-methyltransferase activity. *J Virol* **82**, 8071-8084, doi:10.1128/JVI.00407-08  
553 (2008).
- 554 14 Chen, Y. *et al.* Functional screen reveals SARS coronavirus nonstructural protein nsp14 as a  
555 novel cap N7 methyltransferase. *Proc Natl Acad Sci U S A* **106**, 3484-3489,  
556 doi:10.1073/pnas.0808790106 (2009).
- 557 15 Bouvet, M. *et al.* In vitro reconstitution of SARS-coronavirus mRNA cap methylation. *PLoS*  
558 *Pathog* **6**, e1000863, doi:10.1371/journal.ppat.1000863 (2010).

- 559 16 Slanina, H. *et al.* Coronavirus replication-transcription complex: Vital and selective NMPylation  
560 of a conserved site in nsp9 by the NiRAN-RdRp subunit. *Proc Natl Acad Sci U S A* **118**,  
561 doi:10.1073/pnas.2022310118 (2021).
- 562 17 Bouvet, M. *et al.* Coronavirus Nsp10, a critical co-factor for activation of multiple replicative  
563 enzymes. *J Biol Chem* **289**, 25783-25796, doi:10.1074/jbc.M114.577353 (2014).
- 564 18 Czarna, A. *et al.* Refolding of lid subdomain of SARS-CoV-2 nsp14 upon nsp10 interaction  
565 releases exonuclease activity. Preprint at *bioRxiv*, 2022.2002.2017.480845,  
566 doi:10.1101/2022.02.17.480845 (2022).
- 567 19 Newman, J. A., Imprachim, N., Yosaatmadja, Y. & Gileadi, O. (RCSB Protein Data Bank, 2022).
- 568 20 Kozielski, F. *et al.* Identification of fragments binding to SARS-CoV-2 nsp10 reveals ligand-  
569 binding sites in conserved interfaces between nsp10 and nsp14/nsp16. *RSC Chem Biol* **3**, 44-  
570 55, doi:10.1039/d1cb00135c (2022).
- 571 21 Aouadi, W. *et al.* Binding of the Methyl Donor S-Adenosyl-L-Methionine to Middle East  
572 Respiratory Syndrome Coronavirus 2'-O-Methyltransferase nsp16 Promotes Recruitment of  
573 the Allosteric Activator nsp10. *J Virol* **91**, doi:10.1128/JVI.02217-16 (2017).
- 574 22 Schlee, M. & Hartmann, G. Discriminating self from non-self in nucleic acid sensing. *Nature*  
575 *Reviews Immunology* **16**, 566-580, doi:10.1038/nri.2016.78 (2016).
- 576 23 Ahmed-Belkacem, R. *et al.* Synthesis of adenine dinucleosides SAM analogs as specific  
577 inhibitors of SARS-CoV nsp14 RNA cap guanine-N7-methyltransferase. *Eur J Med Chem* **201**,  
578 112557, doi:10.1016/j.ejmech.2020.112557 (2020).
- 579 24 Riccio, A. A., Sullivan, E. D. & Copeland, W. C. Activation of the SARS-CoV-2 NSP14 3'-5'  
580 exoribonuclease by NSP10 and response to antiviral inhibitors. *J Biol Chem* **298**, 101518,  
581 doi:10.1016/j.jbc.2021.101518 (2021).
- 582 25 Krafcikova, P., Silhan, J., Nencka, R. & Boura, E. Structural analysis of the SARS-CoV-2  
583 methyltransferase complex involved in RNA cap creation bound to sinefungin. *Nat Commun*  
584 **11**, 3717, doi:10.1038/s41467-020-17495-9 (2020).
- 585 26 Viswanathan, T. *et al.* Structural basis of RNA cap modification by SARS-CoV-2. *Nat Commun*  
586 **11**, 3718, doi:10.1038/s41467-020-17496-8 (2020).
- 587 27 Franke, D. & Svergun, D. I. DAMMIF, a program for rapid ab-initio shape determination in  
588 small-angle scattering. *J Appl Crystallogr* **42**, 342-346, doi:10.1107/S0021889809000338  
589 (2009).
- 590 28 Panjkovich, A. & Svergun, D. I. Deciphering conformational transitions of proteins by small  
591 angle X-ray scattering and normal mode analysis. *Phys Chem Chem Phys* **18**, 5707-5719,  
592 doi:10.1039/c5cp04540a (2016).
- 593 29 Ma, Y. *et al.* Structural basis and functional analysis of the SARS coronavirus nsp14-nsp10  
594 complex. *Proc Natl Acad Sci U S A* **112**, 9436-9441, doi:10.1073/pnas.1508686112 (2015).
- 595 30 Pabis, M. *et al.* Molecular basis for the bifunctional Uba4-Urm1 sulfur-relay system in tRNA  
596 thiolation and ubiquitin-like conjugation. *EMBO J* **39**, e105087,  
597 doi:10.15252/embj.2020105087 (2020).
- 598 31 Bodzon-Kulakowska, A. *et al.* Proteomic analysis of striatal neuronal cell cultures after  
599 morphine administration. *J Sep Sci* **32**, 1200-1210, doi:10.1002/jssc.200800464 (2009).
- 600 32 Basu, S. *et al.* Identifying SARS-CoV-2 antiviral compounds by screening for small molecule  
601 inhibitors of Nsp14 RNA cap methyltransferase. *Biochem J* **478**, 2481-2497,  
602 doi:10.1042/bcj20210219 (2021).

603

604

605 Extended Data

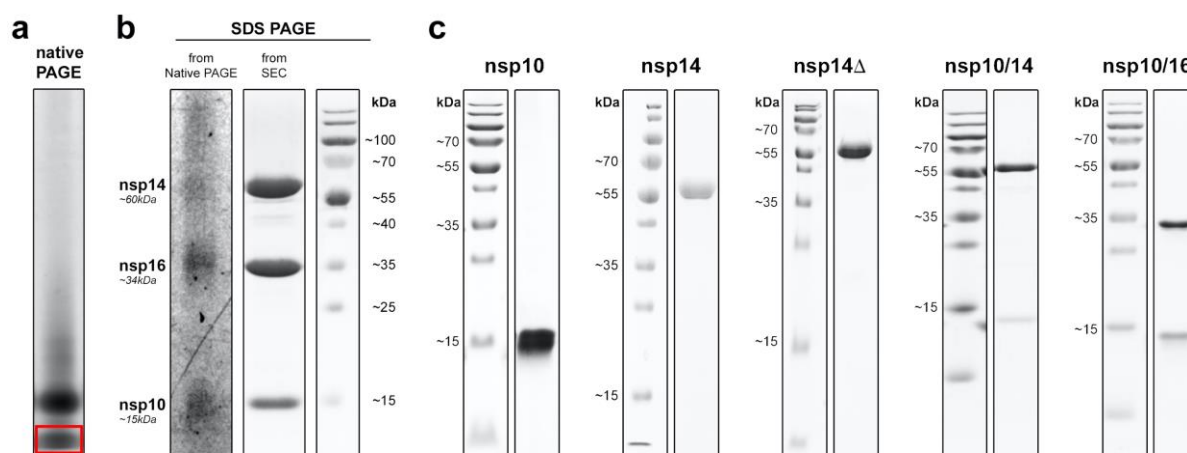

606  
607 **Extended Data Fig. 1** | a, Native-PAGE of heterotrimer. b, SDS-PAGE of the band excited from the native-PAGE (red box showing disintegration of the heterotrimer  
608 into nsp14, nsp16, and nsp10. c, SDS-PAGE illustrating the purity of nsp10, nsp14, nsp14Δ, nsp10/14, and nsp10/16 proteins.  
609

610  
611 **Extended Table 1.** Qualitative MS analysis of the native PAGE gel band indicated in red box, in Extended Data Fig. 1a.

| Description                | Score     | Coverage |
|----------------------------|-----------|----------|
| >sp Nsp14tag_PROTEIN       | 10'464.37 | 85.61    |
| >sp Nsp14_PROTEIN          | 10'156.82 | 85.28    |
| >sp Nsp16tag_PROTEIN       | 9'601.49  | 86.83    |
| >sp Nsp10tag_PROTEIN       | 7'572.82  | 100.00   |
| >sp Nsp10_PROTEIN          | 7'408.26  | 100.00   |
| >sp K1C10_HUMAN            | 3'205.43  | 56.83    |
| >sp K2C1_HUMAN             | 2'357.77  | 47.90    |
| >sp K1C9_HUMAN             | 2'156.15  | 48.96    |
| >sp TRYP_PIG               | 1'814.17  | 35.50    |
| >sp K22E_HUMAN             | 1'653.50  | 43.26    |
| >sp 3264P0DTD13569_PROTEIN | 398.47    | 22.55    |
| >sp K1C15_SHEEP            | 215.66    | 9.27     |
| >sp CAS1_BOVIN             | 169.83    | 22.43    |
| >sp ALBU_HUMAN             | 155.74    | 8.05     |
| >sp ALBU_BOVIN             | 146.29    | 8.40     |
| >sp CASB_BOVIN             | 59.51     | 8.48     |
| >sp MINDY3mod_HUMAN        | 21.06     | 1.34     |

612

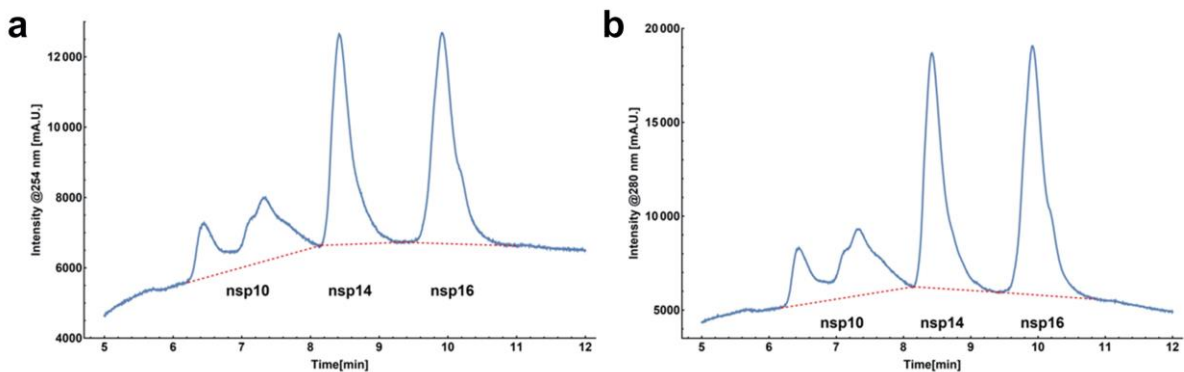

613

614

Extended Data Fig. 2 | Mass spectroscopy of the heterotrimer at 254 and 280 nm.

615

616

Extended Data Table 2 | Summary of the peak volumes from Extended Data Fig. 2 presenting 1.2:1:1 ratio of nsp10/14/16.

|       | Peak 1<br>(fr. 6.3-8.0) | Peak 2<br>(fr. 8.2-9.3) | Peak 3<br>(fr. 9.6-10.7) | Average<br>surface area | Total   | Percent | Ratio |
|-------|-------------------------|-------------------------|--------------------------|-------------------------|---------|---------|-------|
| nsp10 | 64.5% (100)             | 22% (19.6)              | 13.5% (10.9)             | 145'756                 | 205'562 | 38%     | 1.2   |
| nsp14 | 0% (0.0)                | 90% (80.4)              | 10% (8.2)                | 187'293                 | 167'747 | 31%     | 1.0   |
| nsp16 | 0% (0.0)                | 0% (0.0)                | 100% (80.9)              | 211'899                 | 171'638 | 31%     | 1.0   |

617

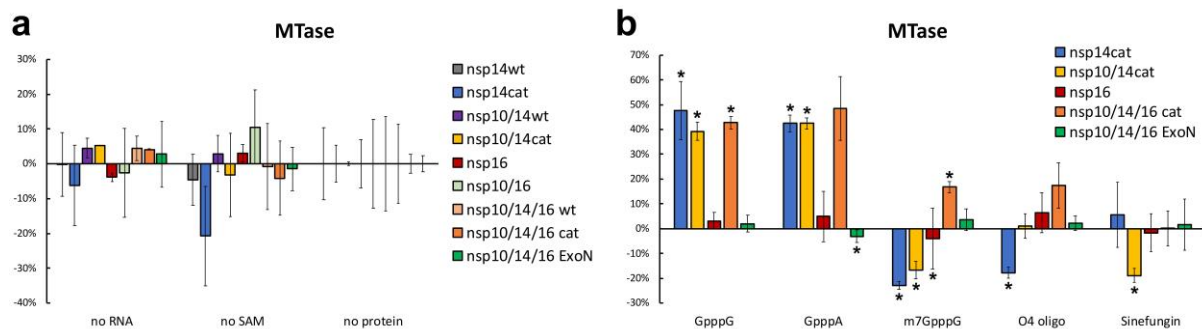

618

619

Extended Data Fig. 3 | Modulation of the methyltransferase activity by the protein partners.

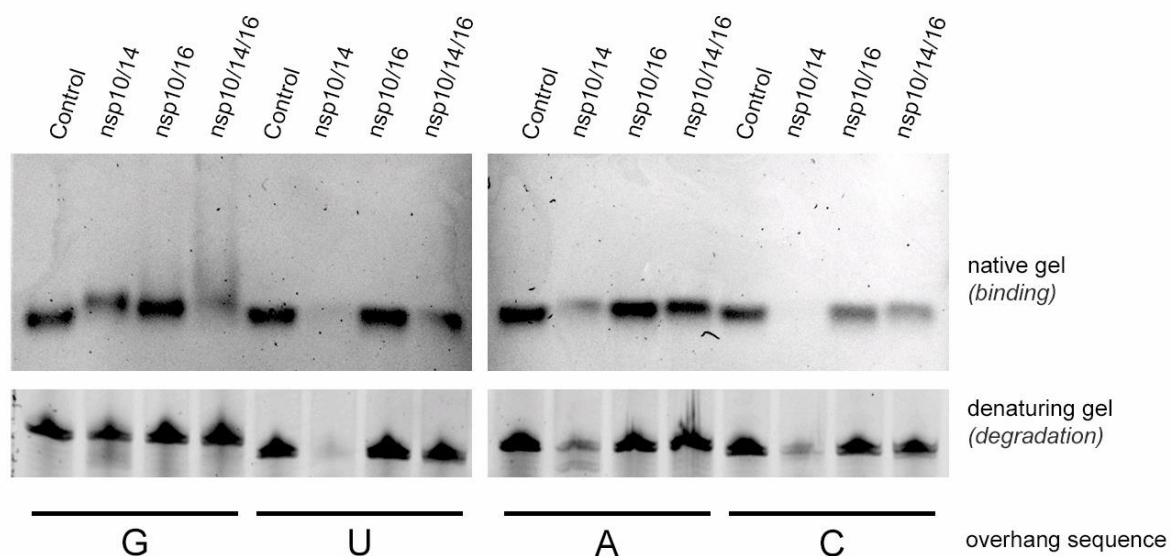

620

621

Extended Data Fig. 4 | Uncropped RNA gels presented on Fig. 2.

622

623

**Extended Data Table 3.** Summary of the structural parameters derived from scattering profiles.

| <b>a. Sample details</b>                                |                                                              |                       |                       |                       |
|---------------------------------------------------------|--------------------------------------------------------------|-----------------------|-----------------------|-----------------------|
|                                                         | nsp14                                                        | nsp10/14              | nsp10/16              | nsp10/14/16           |
| Source organism                                         | <i>Severe acute respiratory syndrome coronavirus 2</i>       |                       |                       |                       |
| Source                                                  | <i>E. coli BL21</i>                                          |                       |                       |                       |
| UniProt sequence ID<br>(residues in construct)          | PODTD1<br>(5926-6452)                                        | PODTD1<br>(5926-6452) | -                     | PODTD1<br>(5926-6452) |
|                                                         | -                                                            | PODTC1<br>(4254-4392) | PODTC1<br>(4254-4392) | PODTC1<br>(4254-4392) |
|                                                         | -                                                            | -                     | PODTD1<br>(6799-7096) | PODTD1<br>(6799-7096) |
| Molecular weight from chemical composition (kDa)        | 60                                                           | 75                    | 48.5                  | 108.5                 |
| SEC-SAXS column                                         | AdvanceBio Bio SEC 300 column                                |                       |                       |                       |
| Loading concentration (mg/mL)                           | 4                                                            | 3.5                   | 2.6                   | 2.8                   |
| Injection volume (μL)                                   | 100                                                          |                       |                       |                       |
| Flow rate (mg/mL)                                       | 0.16                                                         |                       |                       |                       |
| Running phase composition                               | 50mM Tris, 150mM NaCl, 5mM MgCl <sub>2</sub> , βME 2mM pH8.5 |                       |                       |                       |
| <b>b. SAXS data-collection parameters</b>               |                                                              |                       |                       |                       |
| Instrument                                              | BM29, ESRF, Grenoble France                                  |                       |                       |                       |
| Detector                                                | Pilatus2M                                                    |                       |                       |                       |
| Wavelength                                              | 0.99 Å                                                       |                       |                       |                       |
| Sample to detector distance                             | 2.83 m                                                       |                       |                       |                       |
| <b>c. Structural parameters</b>                         |                                                              |                       |                       |                       |
|                                                         | nsp14                                                        | nsp10/14              | nsp10/16              | nsp10/14/16           |
| Guinier analysis                                        |                                                              |                       |                       |                       |
| I(0) (cm <sup>-1</sup> )                                | 8.43 ± 0.13                                                  | 3.22 ± 0.13           | 1.73 ± 0.09           | 5.26 ± 0.11           |
| R <sub>g</sub> (Å)                                      | 28.0 ± 0.5                                                   | 30.1 ± 1.8            | 21.0 ± 1.5            | 40.3 ± 1.0            |
| qR <sub>g</sub> (Å <sup>-1</sup> )                      | 0.59 – 1.51                                                  | 0.59 – 1.32           | 0.52 – 1.39           | 0.76 – 1.4            |
| P(r) analysis                                           |                                                              |                       |                       |                       |
| R <sub>g</sub> (Å)/<br>I(0) (cm <sup>-1</sup> )         | 29.4/8.61                                                    | 32.5/3.28             | 21.1/1.64             | 41.2/5.23             |
| Guinier R <sub>g</sub> (Å)/<br>I(0) (cm <sup>-1</sup> ) | 29.4/8.61                                                    | 32.7/3.28             | 21.2/1.64             | 41.5/5.23             |
| r <sub>max</sub> (Å)                                    | 95.8                                                         | 122.0                 | 80.0                  | 140.0                 |
| Total quality estimate                                  | 0.94                                                         | 0.78                  | 0.75                  | 0.77                  |
| Molecular weight estimate/predicted (kDa)               | 33.1/60                                                      | 28.9/75               | 20.6/48.5             | 83.2/108.5            |
| Oligomerization state                                   | monomeric                                                    |                       |                       |                       |
| <b>d. Shape model-fitting results</b>                   |                                                              |                       |                       |                       |
|                                                         | nsp14                                                        | nsp10/14              | nsp10/16              | nsp10/14/16           |
| DAMMIF (10 runs)                                        |                                                              |                       |                       |                       |
| q <sub>max</sub> range for fitting(Å <sup>-1</sup> )    | 0.26                                                         | 0.26                  | 0.21                  | 0.17                  |
| Symmetry, anisotropy assumptions                        | P1, none                                                     |                       |                       |                       |
| NSD (standard deviation)                                | 1.42 (0.07)                                                  | 1.10 (0.07)           | 1.29 (0.14)           | 0.80 (0.08)           |
| Chi-squared                                             | 1.16                                                         | 1.09                  | 1.07                  | 1.08                  |
| Resolution (from SASRES) (Å)                            | 43 ± 3                                                       | 39.3 ± 3              | 33.3 ± 3              | 38.3 ± 3              |
| SASDBD IDs                                              | SASDKT6                                                      | SASDKU6               | SASDKV6               | SASDKW6               |
| <b>e. Oligomer volume fractions</b>                     |                                                              |                       |                       |                       |
| volume fractions Chi <sup>2</sup> 1.06                  |                                                              |                       |                       |                       |
| nsp10/16 (6YZ1)                                         | nsp16                                                        | nsp14                 | nsp10                 | nsp10/14 (5CU8U)      |
| 53%                                                     | 0%                                                           | 47%                   | 0%                    | 0%                    |

624

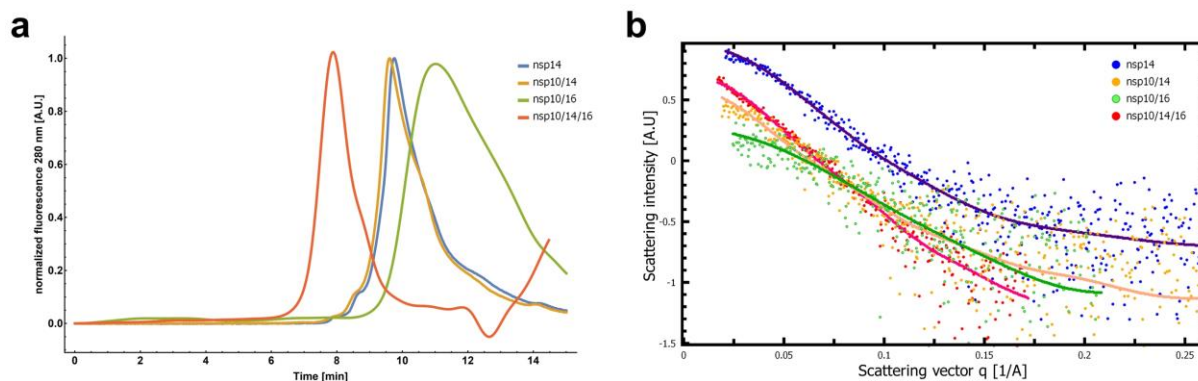

625  
 626 **Extended Data Fig. 5 | SEC-SAXS.** **a**, The SEC profiles for nsp10/14/16 (red), nsp10/14 (yellow), nsp14 (blue) and nsp10/16 (green) directly before flow cell for SAXS  
 627 measurement. The 280 nm fluorescence intensity was normalized for clarity. **b**, SAXS scattering profiles resulting from merging the signal from SEC-SAXS  
 628 experiments for nsp10/14/16 (red), nsp10/14 (yellow), nsp14 (blue) and nsp10/16 (green). The solid lines represents the fit of the experimental data to the real  
 629 space models. In both cases the position closer to the left (lower elution volumes or the curvature change at smaller scattering vector values  $q$ ) indicate larger  
 630 objects that were analyzed. Therefore, nsp10/14/16 represents the largest from the analyzed protein complexes, while nsp10/16 the smallest, which is in the  
 631 agreement with their theoretical masses calculated from the amino acid sequences.  
 632

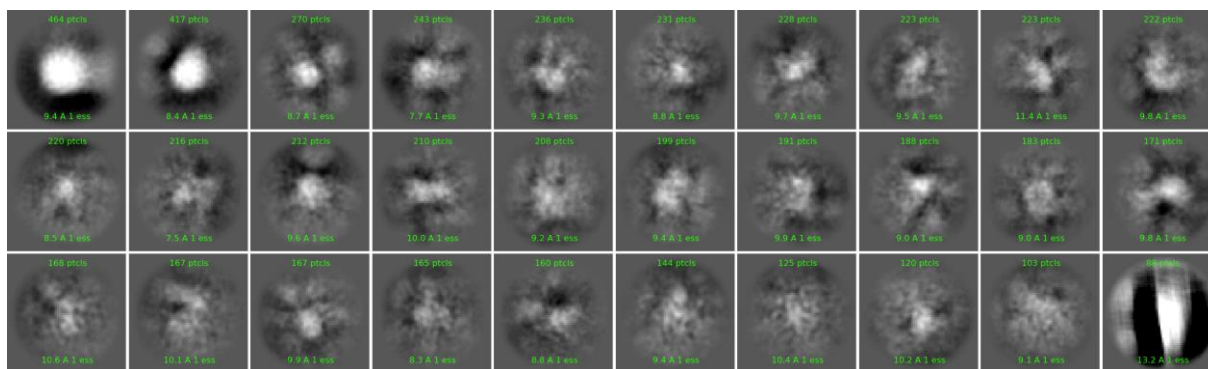

633  
 634 **Extended Data Fig. 6 | 2D classes picked in cryoSPARC for full length heterotrimer.**  
 635

### 636 *CryoEM*

637 We attempted to solve a high-resolution heterotrimer structure using cryoEM techniques. Highly purified  
 638 heterotrimer solution was vitrified on grids using Vitrobot under various conditions. Resulting grids were measured  
 639 using Titan Krios G3i at Solaris, Poland. Data analysis was performed using cryoSPARC software. We managed to  
 640 train the TOPAZ neural networks to pick approximately 0.5 M particles used to generate 50 2D classes, out of  
 641 which 20 were manually picked. Generated classes, though noisy, exhibit croissant-like shape with four distinct  
 642 domains that correspond to nsp16, nsp10 and two domains of nsp14 (highlighted with arrows on the class that  
 643 shows side-on view). Unfortunately, we were not able to reconstruct a high-resolution 3D structure from collected  
 644 data. Our best attempt shown below in cyan has ca. 9 Å resolution. The fitted heterotrimer hybrid model based  
 645 on SAXS data (gold) shows overall good fit with the extra volume that may arise from the flexible nature of the  
 646 heterotrimer.

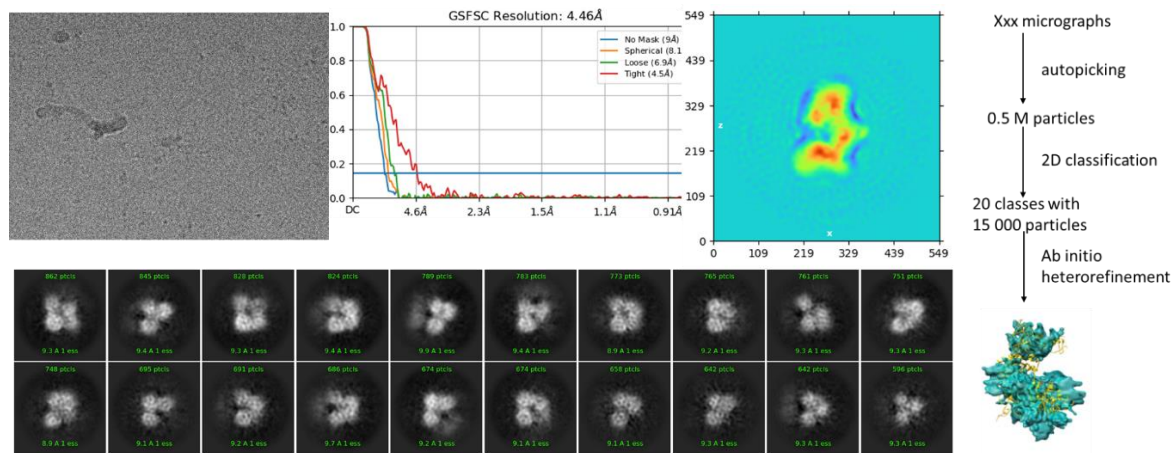

647  
648  
649

Extended Data Fig. 7 | An overview of cryoEM data analysis in cryoSPARC. The overlay of generated 3D model from cryoEM (cyan) and SAXS model (gold).
